# Supplementary material for: Development and validation of a checklist for use with automatically generated radiotherapy plans
Source: PubMed Central journal article supplement (PMC9512344; doi:10.1002/acm2.13694), 2022-06-30
Supplement: ACM2-23-e13694-s001.pdf [file ACM2-23-e13694-s001.pdf]

## Checklist for Review of RPA Output Plans

### Prescription / Service Request

|                   |                      |     |                          |
|-------------------|----------------------|-----|--------------------------|
| Service Date      | Patient Name         | MRN | Patient De-identified ID |
| Treatment Site    | Disease Extent       |     | Laterality               |
| Treatment Machine | Technique (VMAT, 3D) |     | Energy                   |
| Total Dose        | Fractionation        |     | Target coverage          |

### CT Scan

|                                                                                      |                                                   |
|--------------------------------------------------------------------------------------|---------------------------------------------------|
| Marked Isocenter correctly identified ( <b>Head and Neck</b> or <b>Cervix</b> plans) |                                                   |
| Planning CT date                                                                     | Consistent # of CT slices in RPA & TPS            |
| Patient Orientation (HFS)                                                            | Acceptable CT image quality (artifacts, FOV, etc) |
| Target names                                                                         | Target contours                                   |
| OAR names                                                                            | OAR contours                                      |
| Target margins                                                                       | Body/External Contour                             |

### Final RPA Plan

|                                                                                    |                  |                    |
|------------------------------------------------------------------------------------|------------------|--------------------|
| Gantry angle                                                                       | Collimator angle | Couch angle        |
| Planning constraints met                                                           | Hot Spot Dose    | Hot Spot in Target |
| RPA QA Checks Passed                                                               |                  |                    |
| Shift from marked isocenter to final isocenter verified                            |                  |                    |
| <b>If Cervix:</b> Reference point set to desired superior field margin             |                  |                    |
| <b>If Chest Wall:</b> Reference point set at desired inferior tangent field margin |                  |                    |

### RPA and TPS Plans

- Plan DICOM imported to TPS without error
- Beam parameters match between TPS and RPA (Gantry angle, collimator angle, table angle, jaw size, etc.)
- MLC pattern matches between TPS and RPA (**Cervix & Chest Wall**)
- MU/beam matches between TPS and RPA prior to recalculation.

**Recalculate with preset values of MU from RPA**

**\*\*Final Plan Review MUST be performed in local TPS following plan recalculation\*\***
